# Supplementary material for: Expression and Function of Granzymes A and B inEscherichia coliPeritonitis and Sepsis
Source: Hindawi journal article supplement (doi:10.1155/2017/4137563), 2017-01-01
Supplement: f2 [file 4137563.f2.pdf]

## SUPPLEMENTARY DATA

### Expression and Function of Granzymes A and B in *Escherichia coli* Peritonitis and Sepsis

M. Isabel García-Laorden<sup>1</sup>, Ingrid Stroo<sup>1,2</sup>, Sanne Terpstra<sup>1</sup>, Sandrine Florquin<sup>3</sup>, Jan Paul Medema<sup>1,4</sup>, Cornelis van 't Veer<sup>1</sup>, Alex F. de Vos<sup>1</sup>, Tom van der Poll<sup>1,5</sup>.

<sup>1</sup>Center for Experimental and Molecular Medicine (CEMM), Academic Medical Center/ University of Amsterdam, Meibergdreef 9, 1105 AZ, Amsterdam, The Netherlands.

<sup>2</sup>Department of Immunopathology, Sanquin Research, Plesmanlaan 125, 1066 CX, Amsterdam, The Netherlands.

<sup>3</sup>Department of Pathology, Academic Medical Center/ University of Amsterdam, Meibergdreef 9, 1105 AZ, Amsterdam, The Netherlands.

<sup>4</sup>Laboratory for Experimental Oncology and Radiobiology (LEXOR), Academic Medical Center, Meibergdreef 9, 1105 AZ, Amsterdam, The Netherlands.

<sup>5</sup>Division of Infectious Diseases. Academic Medical Center/ University of Amsterdam, Meibergdreef 9, 1105 AZ, Amsterdam, The Netherlands.

Correspondence should be addressed to: M. Isabel García-Laorden, Academic Medical Center, Meibergdreef 9, Room G2-130, 1105 AZ Amsterdam, The Netherlands. Phone: +31-20-5665910; Fax: + 31-206977192; E-mail: ihalemgl@yahoo.es

**Supplementary Table 1:** Percentage and median fluorescence intensity (MFI) of *gzmA* and *gzmB* in diverse lymphocyte populations from WT mice during *E. coli* peritonitis.

| <b>A</b>  | Granzyme A |       |       |       |                  |       |         |       | Granzyme B |     |        |        |                  |         |         |        |        |         |     |    |
|-----------|------------|-------|-------|-------|------------------|-------|---------|-------|------------|-----|--------|--------|------------------|---------|---------|--------|--------|---------|-----|----|
|           | CD8+T      |       | CD4+T |       | $\gamma\delta$ T |       | NK1.1+T |       | CD8+T      |     | CD4+T  |        | $\gamma\delta$ T |         | NK1.1+T |        |        |         |     |    |
| 0h        | %          | 1.43  | 0.18  | 1.43  | 3.97             | 1.07  | 0.12    | 0.44  | 3.03       | MFI | 384.00 | 408.00 | 375.00           | 522.50  | 549.00  | 429.00 | 404.50 | 595.00  |     |    |
| 6h        | %          | 5.38  | 0.55  | 2.62  | 7.67             | 3.88  | 1.27    | 1.45  | 6.76       | MFI | 420.50 | 380.00 | 421.50           | 1125.00 | 653.00  | 545.00 | 496.00 | 815.00  |     |    |
| 14h       | %          | 9.42  | 2.55  | 2.47  | 25.00            | 13.55 | 3.44    | 8.64  | 34.25      | MFI | 353.50 | 344.00 | 524.00           | 997.00  | 497.50  | 485.00 | 614.00 | 3173.00 |     |    |
| 20h       | %          | 28.70 | 9.60  | 39.96 | 45.15            | 6.38  | 7.09    | 14.20 | 18.30      | MFI | 436.00 | 470.00 | 1080.50          | 780.00  | 631.00  | 404.00 | 580.50 | 667.50  |     |    |
|           |            | %     | MFI   | %     | MFI              | %     | MFI     | %     | MFI        | %   | MFI    | %      | MFI              | %       | MFI     | %      | MFI    | %       | MFI |    |
| P 0 vs 6  |            | *     | ns    | *     | ns               | ns    | ns      | **    | *          | **  | ns     | **     | ns               | *       | ns      | *      | ns     | *       | ns  |    |
| P 0 vs 14 |            | **    | ns    | **    | ns               | ns    | ns      | **    | **         | **  | ns     | **     | ns               | ns      | ns      | **     | ns     | **      | **  |    |
| P 0 vs 20 |            | **    | ns    | **    | ns               | **    | *       | **    | ns         | **  | ns     | **     | ns               | **      | ns      | ns     | ns     | ns      | ns  |    |
| P 6 vs 14 |            | ns    | ns    | **    | ns               | ns    | ns      | **    | ns         | *   | ns     | *      | ns               | ns      | ns      | ns     | ns     | **      | **  |    |
| P 6 vs 20 |            | **    | ns    | **    | ns               | *     | ns      | *     | ns         | ns  | ns     | ns     | ns               | ns      | ns      | ns     | ns     | *       | ns  | ns |
| P14 vs 20 |            | **    | ns    | *     | ns               | ns    | ns      | ns    | ns         | ns  | ns     | ns     | ns               | ns      | ns      | ns     | ns     | ns      | ns  | ** |

  

| <b>B</b>  | Granzyme A |      |       |      |                  |      |         |      | Granzyme B |     |        |        |                  |         |         |        |         |         |     |
|-----------|------------|------|-------|------|------------------|------|---------|------|------------|-----|--------|--------|------------------|---------|---------|--------|---------|---------|-----|
|           | CD8+T      |      | CD4+T |      | $\gamma\delta$ T |      | NK1.1+T |      | CD8+T      |     | CD4+T  |        | $\gamma\delta$ T |         | NK1.1+T |        |         |         |     |
| 0h        | %          | 0.34 | 0.26  | 1.14 | 18.80            | 0.05 | 0.04    | 0.24 | 6.57       | MFI | 760.00 | 879.00 | 684.00           | 1078.00 | 786.00  | 764.00 | 1445.00 | 653.00  |     |
| 6h        | %          | 1.16 | 0.39  | 2.75 | 19.60            | 1.08 | 0.43    | 3.16 | 21.10      | MFI | 470.00 | 528.50 | 398.50           | 1049.50 | 569.50  | 544.50 | 472.50  | 755.00  |     |
| 14h       | %          | 1.68 | 0.42  | 6.85 | 44.00            | 2.34 | 0.80    | 6.64 | 51.55      | MFI | 470.00 | 566.00 | 870.50           | 1438.00 | 549.00  | 592.00 | 696.00  | 1786.50 |     |
| 20h       | %          | 1.76 | 1.15  | 3.36 | 36.30            | 2.13 | 1.04    | 4.03 | 36.75      | MFI | 510.00 | 475.00 | 407.00           | 1133.00 | 513.50  | 458.00 | 434.00  | 1090.50 |     |
|           |            | %    | MFI   | %    | MFI              | %    | MFI     | %    | MFI        | %   | MFI    | %      | MFI              | %       | MFI     | %      | MFI     | %       | MFI |
| P 0 vs 6  |            | *    | *     | ns   | **               | ns   | *       | ns   | ns         | *   | ns     | **     | *                | ns      | *       | ns     | ns      | ns      | ns  |
| P 0 vs 14 |            | **   | *     | ns   | *                | **   | ns      | **   | ns         | **  | ns     | **     | *                | **      | ns      | ns     | **      | **      | *   |
| P 0 vs 20 |            | ns   | *     | **   | *                | *    | *       | ns   | ns         | *   | ns     | *      | **               | ns      | *       | ns     | ns      | ns      | ns  |
| P 6 vs 14 |            | ns   | ns    | ns   | ns               | *    | *       | **   | *          | *   | ns     | ns     | ns               | ns      | ns      | ns     | ns      | **      | **  |
| P 6 vs 20 |            | ns   | ns    | *    | ns               | ns   | ns      | ns   | ns         | ns  | ns     | ns     | *                | ns      | ns      | ns     | ns      | ns      | ns  |
| P14 vs 20 |            | ns   | ns    | ns   | ns               | ns   | *       | ns   | ns         | ns  | ns     | **     | ns               | **      | ns      | ns     | ns      | ns      | ns  |

Values are medians from 5-6 mice of the percentage of each population of lymphocytes expressing *gzmA* or *gzmB* and the MFI in these cells, in uninfected mice and 6, 14 and 20h after infection with  $1.3 \times 10^4$  CFU *E. coli*. A. Values in lymphocyte populations from PLF. B. Values in lymphocyte populations from blood. P values of the comparisons between time points in each lymphocyte population were determined by Mann-Whitney U test. ns: non-significant, \*  $P < 0.05$ , \*\*  $P < 0.01$ .

**Supplementary Table 2:** Cell counts of leukocytes, NK cells and granzyme-positive NK cells in peritoneal lavage fluid from wild-type mice during *E. coli* peritonitis.

|                                       | 0h                                                                  | 6h                                                                   | 14h                                                                    | 20h                                                                     |
|---------------------------------------|---------------------------------------------------------------------|----------------------------------------------------------------------|------------------------------------------------------------------------|-------------------------------------------------------------------------|
| Leukocytes (cells/ml)                 | 5.5*10 <sup>5</sup><br>[5.1*10 <sup>5</sup> -6.72*10 <sup>5</sup> ] | 2.1*10 <sup>5</sup> *<br>[1.7*10 <sup>5</sup> -3.8*10 <sup>5</sup> ] | 1.1*10 <sup>6</sup> ***<br>[1.0*10 <sup>6</sup> -1.2*10 <sup>6</sup> ] | 2.8*10 <sup>6</sup> ***<br>[1.3*10 <sup>6</sup> -4.2*10 <sup>6</sup> ]  |
| NK (%)                                | 2.18<br>[2.1-2.3]                                                   | 4.1*<br>[3.8-4.3]                                                    | 5.1<br>[4.4-5.8]                                                       | 14.7***<br>[6.1-26.6]                                                   |
| NK (cells/ml)                         | 1.3*10 <sup>4</sup><br>[1.1*10 <sup>4</sup> -1.4*10 <sup>4</sup> ]  | 1.0*10 <sup>4</sup> *<br>[7.7*10 <sup>3</sup> -1.3*10 <sup>4</sup> ] | 4.8*10 <sup>4</sup> **<br>[4.7*10 <sup>4</sup> -6.8*10 <sup>4</sup> ]  | 2.7*10 <sup>5</sup> ***#<br>[1.8*10 <sup>5</sup> -3.4*10 <sup>5</sup> ] |
| gzmA <sup>+</sup> NK cells (cells/ml) | 2.7*10 <sup>3</sup><br>[2.6*10 <sup>3</sup> -3.5*10 <sup>3</sup> ]  | 1.4*10 <sup>3</sup> *<br>[1.1*10 <sup>3</sup> -2.0*10 <sup>3</sup> ] | 3.1*10 <sup>3</sup><br>[2.1*10 <sup>3</sup> -3.8*10 <sup>3</sup> ]     | 3.7*10 <sup>3</sup> **<br>[3.2*10 <sup>3</sup> -5.1*10 <sup>3</sup> ]   |
| gzmB <sup>+</sup> NK cells (cells/ml) | 5.5*10 <sup>2</sup><br>[4.0*10 <sup>2</sup> -7.2*10 <sup>2</sup> ]  | 1.2*10 <sup>3</sup><br>[5.2*10 <sup>2</sup> -2.0*10 <sup>3</sup> ]   | 3.6*10 <sup>3</sup> *##<br>[2.6*10 <sup>3</sup> -5.7*10 <sup>3</sup> ] | 2.8*10 <sup>3</sup> §<br>[1.2*10 <sup>3</sup> -3.7*10 <sup>3</sup> ]    |

Values are medians (interquartile range) from 6 mice per group in uninfected mice and 6, 14 and 20h after infection with 1.3\*10<sup>4</sup> CFU *E. coli*. P values of the comparisons between time points were determined by Mann-Whitney U test. \*P<0.01 vs 0h, \*\*P<0.01 vs 6h, #P<0.01 vs 14h, ##P<0.05 vs 6h, §P<0.05 vs 0h.

**Supplementary Table 3:** Cytokines and chemokine plasma levels of wild-type, *gzmA*<sup>-/-</sup>, *gzmB*<sup>-/-</sup> and *gzmAxB*<sup>-/-</sup> mice during *E. coli* peritonitis.

|                              | TNF-α (pg/ml)           | IFN-γ (pg/ml)                 | IL-10 (pg/ml)                    | MCP-1 (pg/ml)               |
|------------------------------|-------------------------|-------------------------------|----------------------------------|-----------------------------|
| <b>6h</b>                    |                         |                               |                                  |                             |
| WT                           | 333.1<br>[65.0-449.8]   | 2.1<br>[2.0-2.8]              | 5.0<br>[0.0-5.0]                 | 461.4<br>[211.2-2478.1]     |
| <i>gzmA</i> <sup>-/-</sup>   | 380.4<br>[246.8-1154.5] | 1.9<br>[1.8-2.4]              | 5.0<br>[5.0-10.2]                | 2402.4<br>[1784.3-8856.3]   |
| <i>gzmB</i> <sup>-/-</sup>   | 509.1<br>[277.9-567.6]  | 1.6<br>[1.3-3.7]              | 11.1<br>[5.0-15.0]               | 4944.6*<br>[2913.9-10000.0] |
| <i>gzmAxB</i> <sup>-/-</sup> | 352.6<br>[160.7-722.3]  | 2.1<br>[1.7-3.3]              | 5.0<br>[0.0-20.6]                | 3109.9<br>[1673.3-7177.0]   |
| <b>14h</b>                   |                         |                               |                                  |                             |
| WT                           | 242.9<br>[191.1-658.5]  | 13.9<br>[8.7-18.7]            | 26.0<br>[10.3-39.3]              | 3226.9<br>[2048.5-9119.0]   |
| <i>gzmA</i> <sup>-/-</sup>   | 504.3<br>[345.1-905.8]  | 4.9<br>[3.7-8.2]              | 42.8<br>[35.4-55.3]              | 4794.1<br>[3412.8-9057.4]   |
| <i>gzmB</i> <sup>-/-</sup>   | 340.0<br>[211.8-403.5]  | 3.4<br>[3.0-5.5]              | 39.2<br>[27.2-87.2]              | 4194.4<br>[2537.9-5862.2]   |
| <i>gzmAxB</i> <sup>-/-</sup> | 500.5<br>[343.9-594.6]  | 3.7 <sup>A</sup><br>[3.0-4.2] | 55.0 <sup>A</sup><br>[48.2-60.3] | 6612.6<br>[3768.6-8089.8]   |
| <b>20h</b>                   |                         |                               |                                  |                             |
| WT                           | 359.8<br>[306.0-379.1]  | 2.9<br>[2.2-3.6]              | 30.1<br>[21.8-38.7]              | 5106.1<br>[3644.4-5946.9]   |
| <i>gzmA</i> <sup>-/-</sup>   | 471.0<br>[206.6-595.7]  | 2.1<br>[0.0-5.0]              | 38.7<br>[13.3-94.1]              | 5759.5<br>[2819.2-7402.9]   |
| <i>gzmB</i> <sup>-/-</sup>   | 460.7<br>[423.1-683.0]  | 11.7<br>[8.9-30.6]            | 47.2<br>[36.6-49.8]              | 6246.2<br>[5911.7-6921.4]   |
| <i>gzmAxB</i> <sup>-/-</sup> | 305.0<br>[263.6-737.4]  | 0.0 <sup>#</sup><br>[0.0-2.2] | 34.5<br>[24.3-74.9]              | 4724.6<br>[3326.6-5834.8]   |

Values are medians (interquartile range) from 7-8 mice per group 6, 14 and 20h after infection with  $1.3 \times 10^4$  CFU *E. coli*. \*P<0.05 vs WT, #P<0.05 vs *gzmB*<sup>-/-</sup> by Mann-Whitney U test.

**A**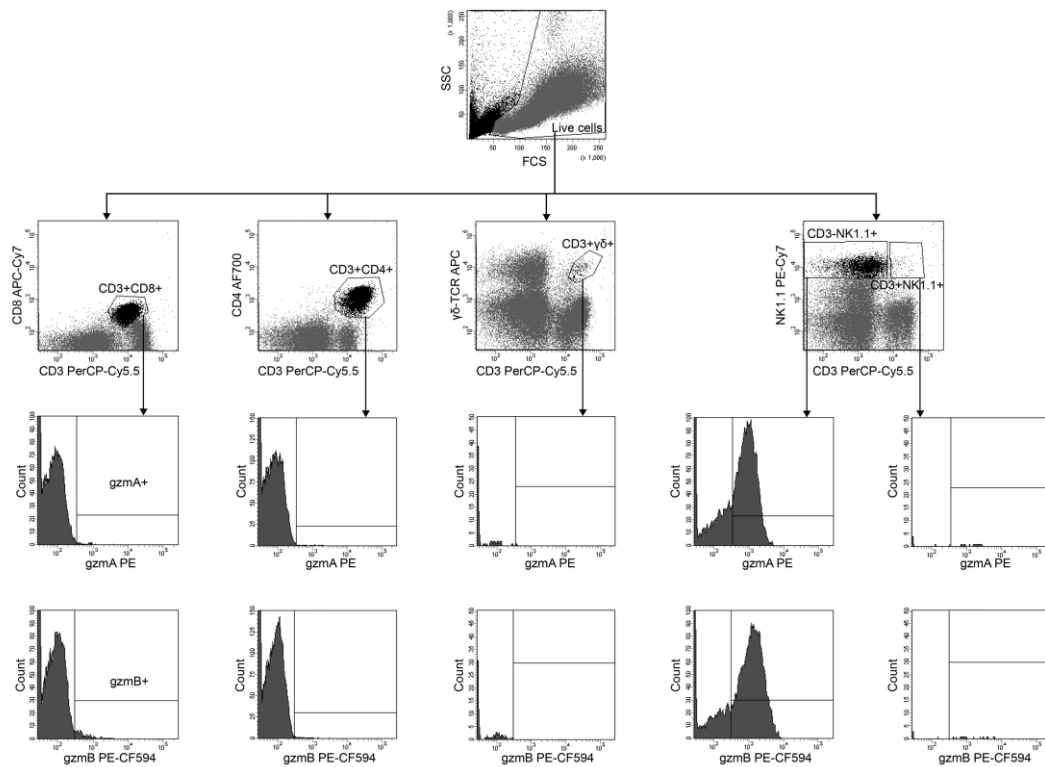**B**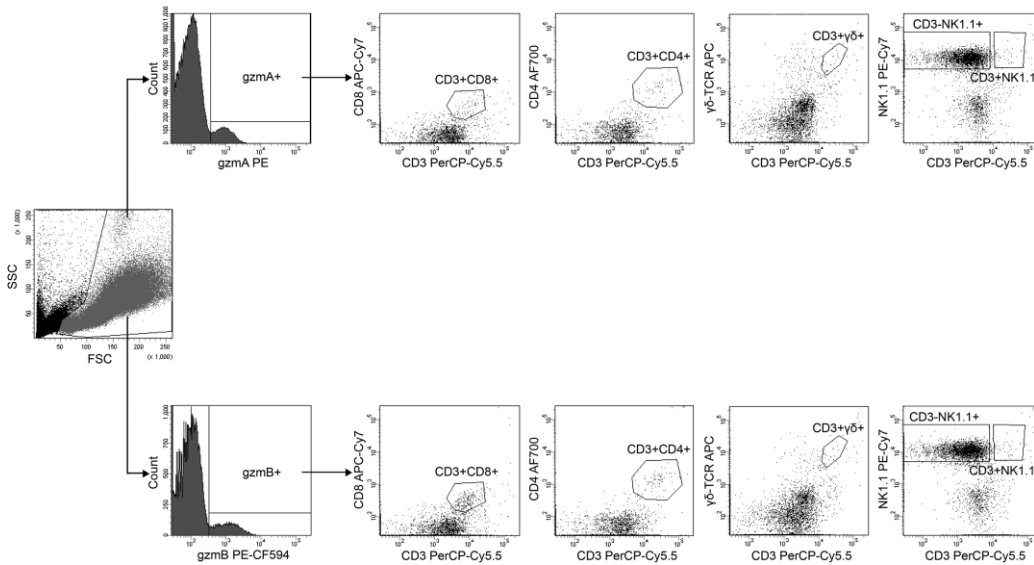

**Supplementary Figure 1: Gating strategy for the analysis of the expression of granzymes**

**A and B by lymphocyte populations in wild-type mice.** Intracellular expression of grzmA and B by lymphocyte populations was analysed in peritoneal lavage fluid (PLF) and blood from wild-type mice by flow cytometry. Leukocytes region was gated on the basis of forward (FSC) and side scattering (SSC) characteristics. A. CD8<sup>+</sup> T (CD3<sup>+</sup>CD8<sup>+</sup>), CD4<sup>+</sup> T (CD3<sup>+</sup>CD4<sup>+</sup>),  $\gamma\delta$  T (CD3<sup>+</sup> $\gamma\delta$  TCR<sup>+</sup>), NK1.1<sup>+</sup> T (CD3<sup>+</sup>NK1.1<sup>+</sup>) and NK (CD3<sup>+</sup>NK1.1<sup>+</sup>) cells were identified by dot-plots, and the percentage of gzm<sup>+</sup> cells in each lymphocyte population as well as the median fluorescence intensity (MFI) of the positive expression were determined in histogram plots. B. GzmA<sup>+</sup> and

gzmB<sup>+</sup> cells were identified by histogram plots, and the percentage of cells corresponding to each lymphocyte population within the gzm<sup>+</sup> cells were determined in dot-plots. Data shown are of blood from a representative individual (gating of PLF samples was done similarly as for blood).

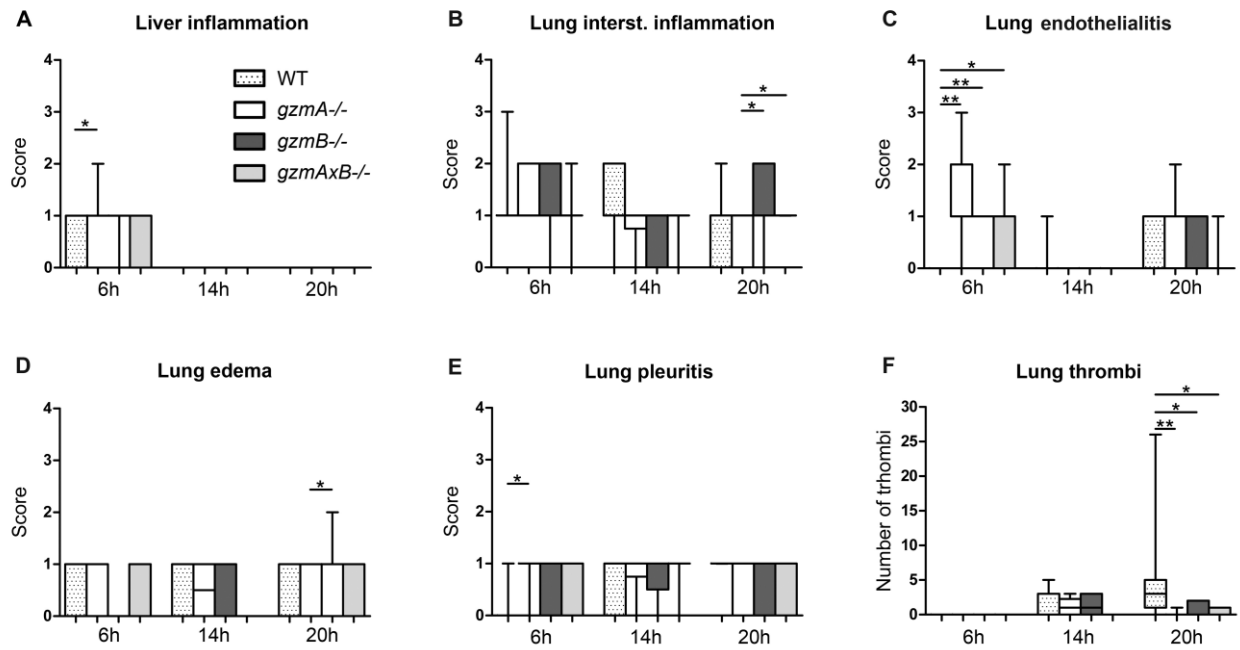

**Supplementary Figure 2: Histopathology of liver and lung from wild-type, *gzmA*<sup>-/-</sup>, *gzmB*<sup>-/-</sup> and *gzmAxB*<sup>-/-</sup> mice during *E. coli* peritonitis.** Mice were infected intraperitoneally with  $1.3 \times 10^4$  CFU *E. coli* and sacrificed at 6, 14 and 20h after infection. Data are box-and-whisker diagrams depicting the smallest observation, lower quartile, median, upper quartile and largest observation. N = 7-8 per group at each time point. \* P<0.05, \*\* P<0.01 determined by Mann-Whitney U test.
