# Supplementary material for: Expression and Function of Granzymes A and B inEscherichia coliPeritonitis and Sepsis
Source: Hindawi journal article supplement (doi:10.1155/2017/4137563), 2017-01-01

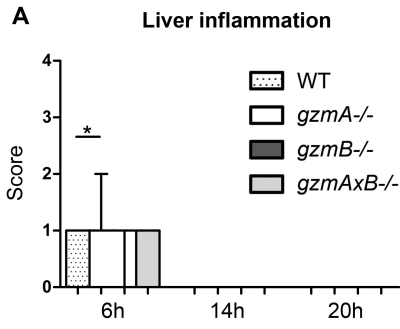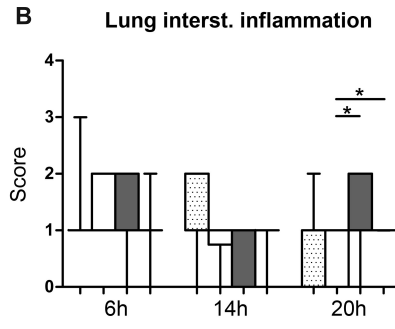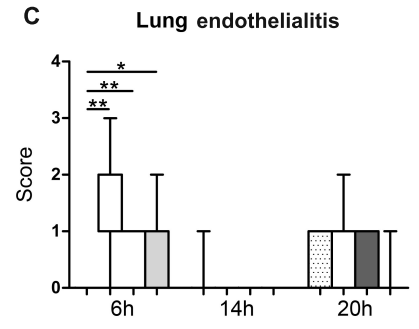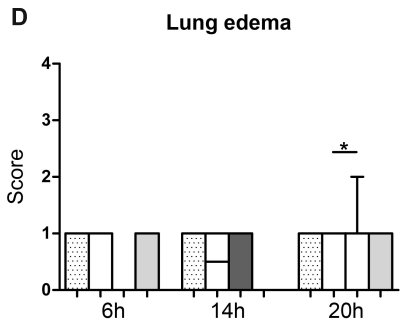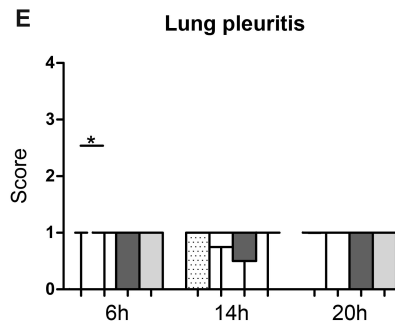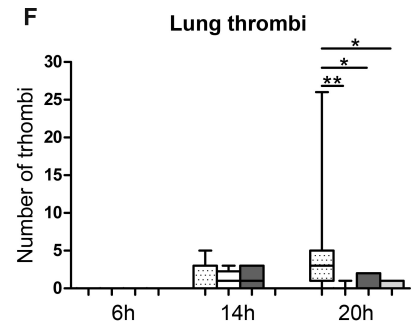

Supplement: f4 [file 4137563.f4.pdf]
